# Supplementary material
Source: PubMed Central journal article supplement (PMC3025784)
Supplement: ejhg2010150x6.pdf [file ejhg2010150x6.pdf]

## Supplemental File 6

Common genes subject to hemizygous deletion in overlapping region of Cohort A

Patients 1 and 2 (and seven genes in a region of hemizygous deletion in Patient 2 but not Patient 1)

| Accession    | Symbol   | Name                                                                  |
|--------------|----------|-----------------------------------------------------------------------|
| NM_020639    | RIPK4    | Receptor-interacting serine-threonine kinase 4                        |
| NM_001040424 | PRDM15   | PR domain containing 15                                               |
| NM_199050    | C2CD2    | C2 calcium-dependent domain containing 2                              |
| NM_020727    | ZNF295   | Zinc finger protein 295                                               |
| NM_173568    | UMODL1   | Uromodulin-like 1                                                     |
| NM_207627    | ABCG1    | ATP-binding cassette, sub-family G (WHITE), member 1                  |
| NM_003226    | TFF3     | Trefoil factor 3 (intestinal)                                         |
| NM_005423    | TFF2     | Trefoil factor 2 (spasmolytic protein 1)                              |
| NM_003225    | TFF1     | Trefoil factor 1                                                      |
| NM_032404    | TMPRSS3  | Transmembrane protease, serine 3                                      |
| NM_018961    | UBASH3A  | Ubiquitin associated and SH3 domain containing, A                     |
| NM_080860    | RSPH1    | Radial spoke head 1 homolog (Chlamydomonas)                           |
| NM_018964    | SLC37A1  | Solute carrier family 37 (glycerol-3-phosphate transporter), member 1 |
| NM_002606    | PDE9A    | Hypothetical protein LOC100132338                                     |
| NM_033661    | WDR4     | WD repeat domain 4                                                    |
| NM_001001503 | NDUFV3   | NADH dehydrogenase (ubiquinone) flavoprotein 3, 10kDa                 |
| NM_004571    | PKNOX1   | PBX/knotted 1 homeobox 1                                              |
| NM_000071    | CBS      | Cystathionine-beta-synthase                                           |
| NM_006758    | U2AF1    | U2 small nuclear RNA auxiliary factor 1                               |
| NM_000394    | CRYAA    | Crystallin, alpha A                                                   |
| NM_173354    | SNF1LK   | SNF1-like kinase                                                      |
| NM_007031    | HSF2BP   | Heat shock transcription factor 2 binding protein                     |
| NM_015056    | RRP1B    | Ribosomal RNA processing 1 homolog B (S. cerevisiae)                  |
| NM_003681    | PDXK     | Pyridoxal (pyridoxine, vitamin B6) kinase                             |
| NM_000100    | CSTB     | Cystatin B (stefin B)                                                 |
| NM_003683    | RRP1     | Ribosomal RNA processing 1 homolog (S. cerevisiae)                    |
| NM_020132    | AGPAT3   | 1-acylglycerol-3-phosphate O-acyltransferase 3                        |
| NM_003274    | TMEM1    | Transmembrane protein 1                                               |
| NM_005049    | PWP2     | PWP2 periodic tryptophan protein homolog (yeast)                      |
| NM_004649    | C21orf33 | Chromosome 21 open reading frame 33                                   |
| NM_015259    | ICOSLG   | Inducible T-cell co-stimulator ligand                                 |
| NM_013369    | DNMT3L   | DNA (cytosine-5-)-methyltransferase 3-like                            |
| NM_000383    | AIRE     | Autoimmune regulator                                                  |
| NM_002626    | PFKL     | Phosphofructokinase, liver                                            |

|              |            |                                                                    |
|--------------|------------|--------------------------------------------------------------------|
| NM_004928    | C21orf2    | Chromosome 21 open reading frame 2                                 |
| NM_003307    | TRPM2      | Transient receptor potential cation channel                        |
| NM_030891    | LRRC3      | Leucine rich repeat containing 3                                   |
| NM_144991    | C21orf29   | Chromosome 21 open reading frame 29                                |
| NM_198691    | KRTAP10-1  | Keratin associated protein 10-1                                    |
| NM_198693    | KRTAP10-2  | Keratin associated protein 10-2                                    |
| NM_198696    | KRTAP10-3  | Keratin associated protein 10-3                                    |
| NM_198687    | KRTAP10-4  | Keratin associated protein 10-4                                    |
| NM_198694    | KRTAP10-5  | Keratin associated protein 10-5                                    |
| NM_198688    | KRTAP10-6  | Keratin associated protein 10-6                                    |
| NM_198689    | KRTAP10-7  | Keratin associated protein 10-7                                    |
| NM_198695    | KRTAP10-8  | Keratin associated protein 10-8                                    |
| NM_198690    | KRTAP10-9  | Keratin associated protein 10-9                                    |
| NM_181688    | KRTAP10-10 | Keratin associated protein 10-10                                   |
| NM_198692    | KRTAP10-11 | Keratin associated protein 10-11                                   |
| NM_198698    | KRTAP12-4  | Keratin associated protein 12-4                                    |
| NM_198697    | KRTAP12-3  | Keratin associated protein 12-3                                    |
| NM_181684    | KRTAP12-2  | Keratin associated protein 12-2                                    |
| NM_181686    | KRTAP12-1  | Keratin associated protein 12-1                                    |
| NM_198699    | KRTAP10-12 | Keratin associated protein 10-12                                   |
| NM_003343    | UBE2G2     | Ubiquitin-conjugating enzyme E2G 2 (UBC7 homolog, yeast)           |
| NM_006936    | SUMO3      | SMT3 suppressor of mif two 3 homolog 3 ( <i>S. cerevisiae</i> )    |
| NM_004339    | PTTG1IP    | Pituitary tumor-transforming 1 interacting protein                 |
| NM_000211    | ITGB2      | Integrin, beta 2 (complement component 3 receptor 3 and 4 subunit) |
| NM_058190    | C21orf70   | Chromosome 21 open reading frame 70                                |
| NM_001112    | ADARB1     | Adenosine deaminase, RNA-specific, B1 (RED1 homolog rat)           |
| NM_015227    | POFUT2     | Protein O-fucosyltransferase 2                                     |
| NM_130445    | COL18A1    | Collagen, type XVIII, alpha 1                                      |
| NM_199175    | C21orf123  | Chromosome 21 open reading frame 123                               |
| NM_030582    | COL18A1    | Collagen, type XVIII, alpha 1                                      |
| NM_194255    | SLC19A1    | Solute carrier family 19 (folate transporter), member 1            |
| NM_001130141 | PCBP3      | Poly(rC) binding protein 3                                         |
| NM_001848    | COL6A1     | Collagen, type VI, alpha 1                                         |
| NM_058175    | COL6A2     | Collagen, type VI, alpha 2                                         |
| NM_006657    | FTCD       | Formiminotransferase cyclodeaminase                                |
| NM_032261    | C21orf56   | Chromosome 21 open reading frame 56                                |
| NM_001001438 | LSS        | Lanosterol synthase (2,3-oxidosqualene-lanosterol cyclase)         |
| NM_003906    | MCM3AP     | Minichromosome maintenance complex component 3 associated protein  |
| NM_001006114 | C21orf57   | Chromosome 21 open reading frame 57                                |
| NM_058180    | C21orf58   | Chromosome 21 open reading frame 58                                |
| NM_006031    | PCNT       | Pericentrin                                                        |
| NM_206891    | DIP2A      | DIP2 disco-interacting protein 2 homolog A ( <i>Drosophila</i> )   |

|           |         |                                                                                                     |
|-----------|---------|-----------------------------------------------------------------------------------------------------|
| NM_006272 | S100B   | S100 calcium binding protein B                                                                      |
| NM_001535 | PRMT2   | Protein arginine methyltransferase 2                                                                |
| NM_012105 | BACE2   | (Patient 2 only) Beta-site APP-cleaving enzyme 2                                                    |
| NM_182832 | PLAC4   | (Patient 2 only) Placenta-specific 4                                                                |
| NM_058186 | FAM3B   | (Patient 2 only) Family with sequence similarity 3, member B                                        |
| NM_002463 | MX2     | (Patient 2 only) Myxovirus (influenza virus) resistance 2 (mouse)                                   |
| NM_002462 | MX1     | (Patient 2 only) Myxovirus (influenza virus) resistance 1, interferon-inducible protein p78 (mouse) |
| NM_005656 | TMPRSS2 | (Patient 2 only) Transmembrane protease, serine 2                                                   |
| NM_020639 | RIPK4   | (Patient 2 only) Receptor-interacting serine-threonine kinase 4                                     |
